# Supplementary material for: HIF1 driven transcriptional activity regulates steroidogenesis and proliferation of bovine granulosa cells
Source: PubMed Central journal article supplement (PMC7054295; doi:10.1038/s41598-020-60935-1), 2020-03-03
Supplement: 41598_2020_60935_MOESM1_ESM.pdf [file 41598_2020_60935_MOESM1_ESM.pdf]

## Supplementary information

### **HIF1 driven transcriptional activity regulates steroidogenesis and proliferation of bovine granulosa cells**

**Authors:** Vijay Simha Baddela<sup>1</sup>, Arpna Sharma<sup>1</sup>, Marten Michaelis<sup>2</sup>, Jens Vanselow<sup>1\*</sup>

**Affiliations:** <sup>1</sup> Experimental Reproductive Biology Unit, Institute of Reproductive Biology, Leibniz Institute for Farm Animal Biology (FBN), 18196, Dummerstorf, Germany; <sup>2</sup> Reproductive Biochemistry Unit, Institute of Reproductive Biology, Leibniz Institute for Farm Animal Biology (FBN), 18196 Dummerstorf, Germany

**Correspondence:** Jens Vanselow, Experimental Reproductive Biology Unit, Institute of Reproductive Biology, Leibniz Institute for Farm Animal Biology (FBN), Wilhelm-Stahl-Allee 2, 18196 Dummerstorf, Germany; Tel: +49 38208 68750; Fax: +49 38208 68752; e-mail: [vanselow@fbn-dummerstorf.de](mailto:vanselow@fbn-dummerstorf.de)

**S1: PCR primers:**

| Gene              |     | Sequence                   | Accession No. | Product Length |
|-------------------|-----|----------------------------|---------------|----------------|
| RPLP0             | For | TGGTTACCCAACCGTCGCATCTGTA  | NM_001012682  | 142 bp         |
|                   | Rev | CACAAAGGCAGATGGATCAGCCAAG  |               |                |
| TBP               | For | GCCTTGCTTACCCACCAACAGTTC   | NM_001034494  | 200 bp         |
|                   | Rev | TGTCTTCTGAAACCTTCAGAATAGGG |               |                |
| VEGFA             | For | AGGAGCCTCCCTCAGGGTTTCGGG   | NM_001075742  | 183 bp         |
|                   | Rev | CGCTCCGGACCCAAAGTGCTCTGC   |               |                |
| HIF1A             | For | GCATCGCGGGCACCGATTCACCAT   | NM_174339.3   | 165 bp         |
|                   | Rev | TGGGGGAGTGCCAAGTATGAGCA    |               |                |
| STAR              | For | TTGTGAGCGTACGCTGTACCAAG    | NM_174189.2   | 237 bp         |
|                   | Rev | CTGCGAGAGGACCTGGTTGATG     |               |                |
| CYP19A1           | For | GCTTTTGGAAGTGCTGAACCCAAGG  | NM_174305     | 172 bp         |
|                   | Rev | GGGCCCAATCCAGAAAGTAGCTG    |               |                |
| CYP19A1<br>(ChIP) | For | CCACCTCTGGAATGAGCTGC       | NM_174305     | 272 bp         |
|                   | Rev | GTACCGTAGAGATTGGCGCTT      |               |                |
| HSD3B             | For | TGTTGGTGGAGGAGAAGGATCTG    | NM_174343     | 208 bp         |
|                   | Rev | GCATTCCTGACGTCAATGACAGAG   |               |                |
| CCND2             | For | CGCAGGGCCGTGCCGGACGCCAAC   | NM_001076372  | 279 bp         |
|                   | Rev | CACGGCCCCAGCAGCTGCAGATGG   |               |                |
| PCNA              | For | GTGAACCTGCAGAGCATGGACTCGT  | NM_001034494  | 192 bp         |
|                   | Rev | CGTGTCGCGTTATCTTCAGCTCTT   |               |                |
| VNN2              | For | TCCACAGCTTGGATGAACGTTTTG   | NM_001163920  | 267 bp         |
|                   | Rev | TAGGCACTCCAATTCATGGCTGGTG  |               |                |

## **S2: PCR product specificity of different genes under the study:**

All the PCR primers used in the study were verified for single product amplification using 3% agarose gel electrophoresis after each run. The gel pictures below indicate a positive control (standard) and negative control (n.k) samples. The negative control well contains nuclease pure water instead of DNA.

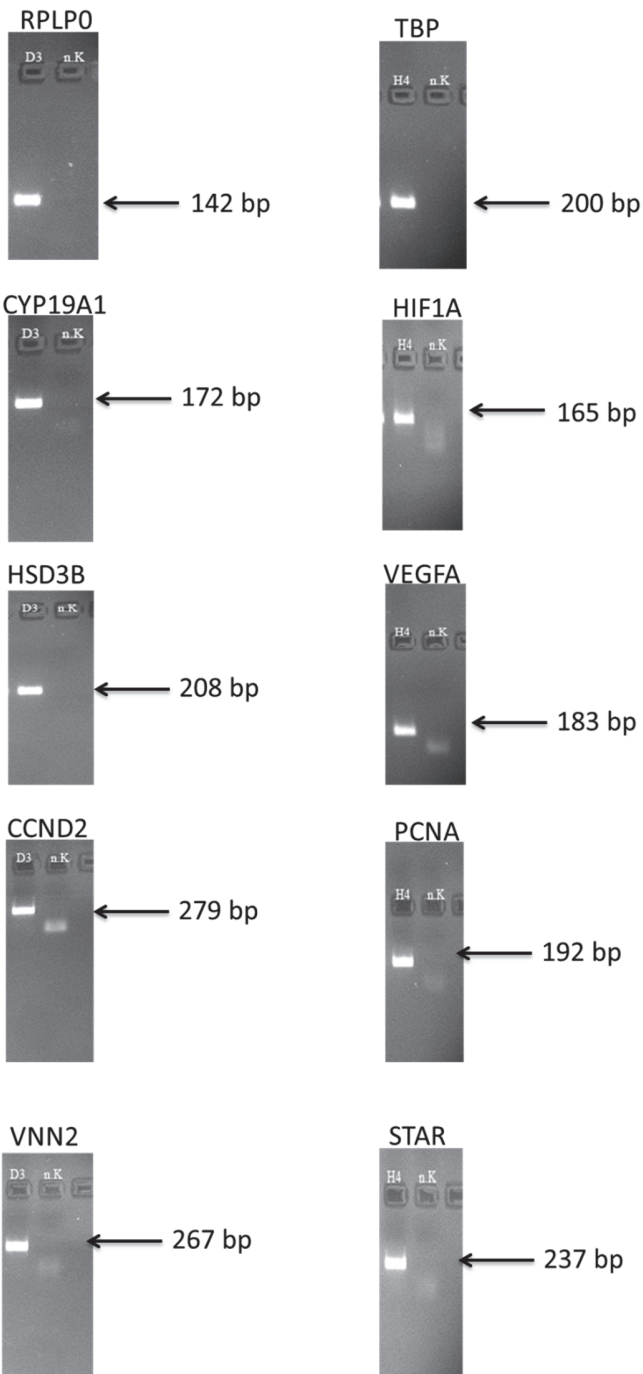

**S3: Morphology of Granulosa cells after treating with echinomycin under normoxic and hypoxic conditions:**

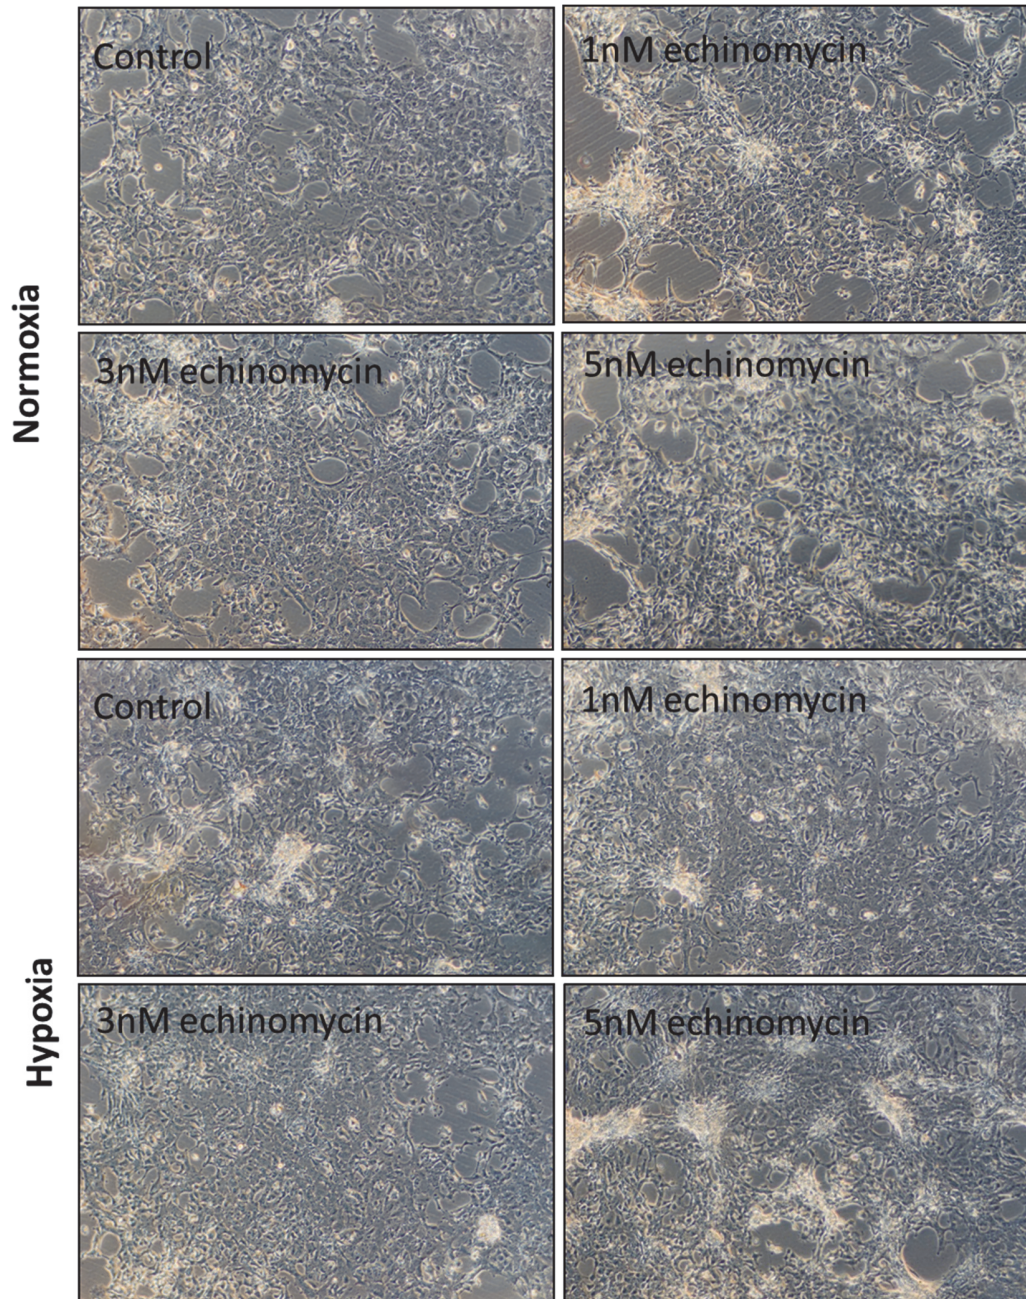

Photomicrographs of GC cultured under serum-free culture system for 8 days. On 6<sup>th</sup> day GC were treated with different concentrations of echinomycin. Photomicrographs were obtained from Nikon TMS-F inverted microscope with 200X magnification.



**S4: Cell viability status in granulosa cells after treatment with echinomycin:**

|                 | 21% Oxygen   |                 |            | 1% Oxygen    |                     |                |
|-----------------|--------------|-----------------|------------|--------------|---------------------|----------------|
| (%)             | Viable cells | Apoptotic cells | Dead cells | Viable cells | Apoptotic cells (%) | Dead cells (%) |
| Control         | 78.167±2.64  | 15.37±1.83      | 5.62±0.67  | 78.65±4.67   | 15.76±3.79          | 5.137±0.96     |
| 5nM Echinomycin | 79.160±5.43  | 9.49±1.46       | 10.49±4.27 | 81.70± 4.25  | 11.72±2.84          | 6.013±11.36    |

- Representative histograms of FACS analysis used for identifying the cell viability and apoptotic status is below.

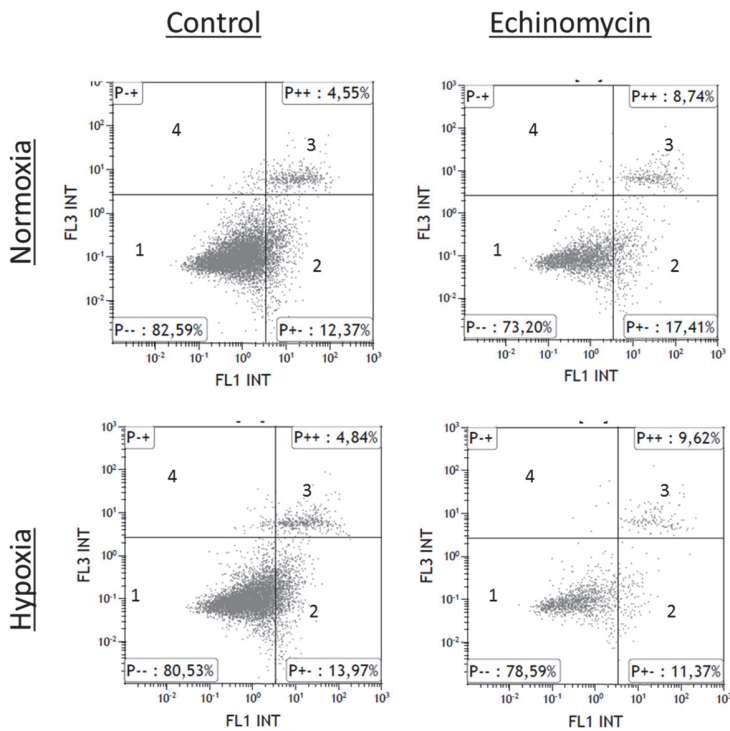

1: viable cells, 2: apoptotic, 3: dead, 4: necrotic cell proportions in the FACS analysis.

**S5: Morphology of Granulosa cells after treating with control and HIF1A gapmers:**

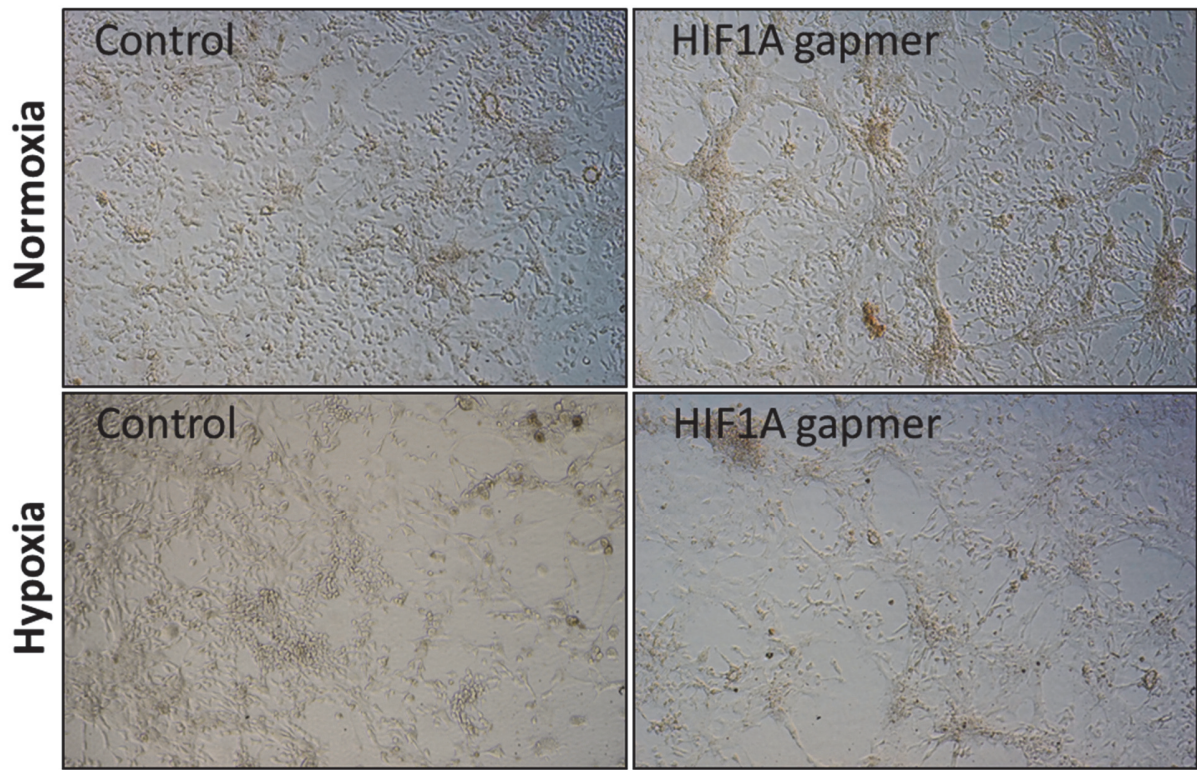

Photomicrographs of GC cultured under serum-free culture system for 8 days. On day 2, GC were incubated with 50nM of HIF1A gapmer for 6 days. Photomicrographs were obtained from Nikon TMS-F inverted microscope with 200X magnification.

**S6: Cell viability status in granulosa cells after treating with control and HIF1A gapmers:**

|                | 21% Oxygen   |                 |            | 1% Oxygen    |                     |                |
|----------------|--------------|-----------------|------------|--------------|---------------------|----------------|
| (%)            | Viable cells | Apoptotic cells | Dead cells | Viable cells | Apoptotic cells (%) | Dead cells (%) |
| Control Gapmer | 91.5±1.5     | 5.6±1.0         | 2.4±0.4    | 90.1±1.9     | 5.3±1.5             | 3.9±0.3        |
| HIF1A Gapmer   | 92.0±0.8     | 5.8±0.7         | 1.9±0.1    | 89.5±2.0     | 7.1±1.7             | 2.8±0.3        |

- Representative histograms of FACS analysis used for identifying the cell viability and apoptotic status is below

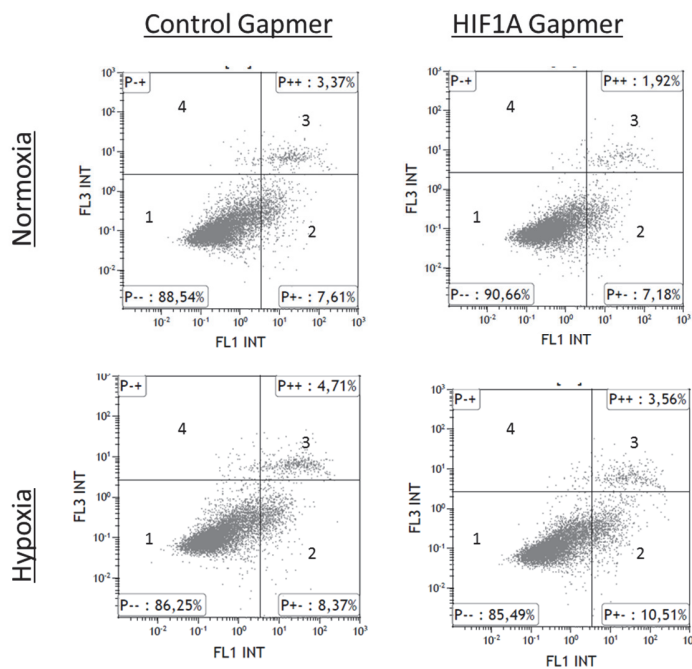

1: viable cells, 2: apoptotic, 3: dead, 4: necrotic cell proportions in the FACS analysis.
